# Supplementary material for: Chromaeus: A Browser-Based Analytical Platform for Quantitative Colorimetric Measurement in Digital Chemistry Applications
Source: Royal Society of Chemistry journal article supplement (doi:10.1039/d6ay00168h), 2026-01-01
Supplement: d6ay00168h1.zip [file supplementary table s1 and s2.xlsx]

## Sheet: S1 Diff DPI and Fİles format
	Benchmarking RGB			R	G	B		Hex			R	G	B		Hex
	Reference colors		R (RGB)	255	0	0		#ff0000		Pink	248	154	153		#F89A99
			G (RGB	0	255	0		#00ff00		Purple	106	48	154		#6a309a
			B (RGB)	0	0	255		#0000ff		Orange	255	127	0		#ff7f00
			Black (RGB)	0	0	0		#000000		Green	51	160	44		#33a02c
	TIFF 300 DPI												JPEG 300 DPI												PNG 300 DPI
	R (RGB)						Pink						R (RGB)						Pink						R (RGB)						Pink
	ID	Mean RGB	R	G	B		ID	Mean RGB	R	G	B		ID	Mean RGB	R	G	B		ID	Mean RGB	R	G	B		ID	Mean RGB	R	G	B		ID	Mean RGB	R	G	B
	R (RGB)	85	255	0	0		Pink	185	248	154	153		R (RGB)	84.7	254	0	0		Pink	185.3	248	154	154		R (RGB)	85	255	0	0		Pink	185	248	154	153
		85	255	0	0			185	248	154	153			84.7	254	0	0			185.3	248	154	154			85	255	0	0			185	248	154	153
		85	255	0	0			185	248	154	153			84.7	254	0	0			185.3	248	154	154			85	255	0	0			185	248	154	153
		85	255	0	0			185	248	154	153			84.7	254	0	0			185.3	248	154	154			85	255	0	0			185	248	154	153
		85	255	0	0			185	248	154	153			84.7	254	0	0			185.3	248	154	154			85	255	0	0			185	248	154	153
	Mean	85	255	0	0		Mean	185	248	154	153		Mean	84.7	254	0	0		Mean	185.3	248	154	154		Mean	85	255	0	0		Mean	185	248	154	153
	SD	0	0	0	0		SD	0	0	0	0		SD	0	0	0	0		SD	0	0	0	0		SD	0	0	0	0		SD	0	0	0	0
	G (RGB						Purple						G (RGB						Purple						G (RGB						Purple
	ID	Mean RGB	R	G	B		ID	Mean RGB	R	G	B		ID	Mean RGB	R	G	B		ID	Mean RGB	R	G	B		ID	Mean RGB	R	G	B		ID	Mean RGB	R	G	B
	G (RGB	85	0	255	0		Purple	102.7	106	48	154		G (RGB	85.3	0	255	1		Purple	102	105	48	153		G (RGB	85	0	255	0		Purple	102.7	106	48	154
		85	0	255	0			102.7	106	48	154			85.3	0	255	1			102	105	48	153			85	0	255	0			102.7	106	48	154
		85	0	255	0			102.7	106	48	154			85.3	0	255	1			102	105	48	153			85	0	255	0			102.7	106	48	154
		85	0	255	0			102.7	106	48	154			85.3	0	255	1			102	105	48	153			85	0	255	0			102.7	106	48	154
		85	0	255	0			102.7	106	48	154			85.3	0	255	1			102	105	48	153			85	0	255	0			102.7	106	48	154
	Mean	85	0	255	0		Mean	102.7	106	48	154		Mean	85.3	0	255	1		Mean	102	105	48	153		Mean	85	0	255	0		Mean	102.7	106	48	154
	SD	0	0	0	0		SD	0	0	0	0		SD	0	0	0	0		SD	0	0	0	0		SD	0	0	0	0		SD	0	0	0	0
	B (RGB)						Orange						B (RGB)						Orange						B (RGB)						Orange
	ID	Mean RGB	R	G	B		ID	Mean RGB	R	G	B		ID	Mean RGB	R	G	B		ID	Mean RGB	R	G	B		ID	Mean RGB	R	G	B		ID	Mean RGB	R	G	B
	B (RGB)	85	0	0	255		Orange	127.3	255	127	0		B (RGB)	84.7	0	0	254		Orange	127.3	255	127	0		B (RGB)	85	0	0	255		Orange	127.3	255	127	0
		85	0	0	255			127.3	255	127	0			84.7	0	0	254			127.3	255	127	0			85	0	0	255			127.3	255	127	0
		85	0	0	255			127.3	255	127	0			84.7	0	0	254			127.3	255	127	0			85	0	0	255			127.3	255	127	0
		85	0	0	255			127.3	255	127	0			84.7	0	0	254			127.3	255	127	0			85	0	0	255			127.3	255	127	0
		85	0	0	255			127.3	255	127	0			84.7	0	0	254			127.3	255	127	0			85	0	0	255			127.3	255	127	0
	Mean	85	0	0	255		Mean	127.3	255	127	0		Mean	84.7	0	0	254		Mean	127.3	255	127	0		Mean	85	0	0	255		Mean	127.3	255	127	0
	SD	0	0	0	0		SD	0	0	0	0		SD	0	0	0	0		SD	0	0	0	0		SD	0	0	0	0		SD	0	0	0	0
	Black (RGB)						Green						Black (RGB)						Green						Black (RGB)						Green
	ID	Mean RGB	R	G	B		ID	Mean RGB	R	G	B		ID	Mean RGB	R	G	B		ID	Mean RGB	R	G	B		ID	Mean RGB	R	G	B		ID	Mean RGB	R	G	B
	Black (RGB)	0	0	0	0		Green	85	51	160	44		Black (RGB)	0	0	0	0		Green	84.7	51	160	43		Black (RGB)	0	0	0	0		Green	85	51	160	44
		0	0	0	0			85	51	160	44			0	0	0	0			84.7	51	160	43			0	0	0	0			85	51	160	44
		0	0	0	0			85	51	160	44			0	0	0	0			84.7	51	160	43			0	0	0	0			85	51	160	44
		0	0	0	0			85	51	160	44			0	0	0	0			84.7	51	160	43			0	0	0	0			85	51	160	44
		0	0	0	0			85	51	160	44			0	0	0	0			84.7	51	160	43			0	0	0	0			85	51	160	44
	Mean	0	0	0	0		Mean	85	51	160	44		Mean	0	0	0	0		Mean	84.7	51	160	43		Mean	0	0	0	0		Mean	85	51	160	44
	SD	0	0	0	0		SD	0	0	0	0		SD	0	0	0	0		SD	0	0	0	0		SD	0	0	0	0		SD	0	0	0	0
	TIFF 150 DPI												JPEG 150 DPI												PNG 150 DPI
	R (RGB)						Pink						R (RGB)						Pink						R (RGB)						Pink
	ID	Mean RGB	R	G	B		ID	Mean RGB	R	G	B		ID	Mean RGB	R	G	B		ID	Mean RGB	R	G	B		ID	Mean RGB	R	G	B		ID	Mean RGB	R	G	B
	R (RGB)	85	255	0	0		Pink	185	248	154	153		R (RGB)	84.7	254	0	0		Pink	185.3	248	154	154		R (RGB)	85	255	0	0		Pink	185	248	154	153
		85	255	0	0			185	248	154	153			84.7	254	0	0			185.3	248	154	154			85	255	0	0			185	248	154	153
		85	255	0	0			185	248	154	153			84.7	254	0	0			185.3	248	154	154			85	255	0	0			185	248	154	153
		85	255	0	0			185	248	154	153			84.7	254	0	0			185.3	248	154	154			85	255	0	0			185	248	154	153
		85	255	0	0			185	248	154	153			84.7	254	0	0			185.3	248	154	154			85	255	0	0			185	248	154	153
	Mean	85	255	0	0		Mean	185	248	154	153		Mean	84.7	254	0	0		Mean	185.3	248	154	154		Mean	85	255	0	0		Mean	185	248	154	153
	SD	0	0	0	0		SD	0	0	0	0		SD	0	0	0	0		SD	0	0	0	0		SD	0	0	0	0		SD	0	0	0	0
	G (RGB						Purple						G (RGB						Purple						G (RGB						Purple
	ID	Mean RGB	R	G	B		ID	Mean RGB	R	G	B		ID	Mean RGB	R	G	B		ID	Mean RGB	R	G	B		ID	Mean RGB	R	G	B		ID	Mean RGB	R	G	B
	G (RGB	85	0	255	0		Purple	102.7	106	48	154		G (RGB	85.3	0	255	1		Purple	102	105	48	153		G (RGB	85	0	255	0		Purple	102.7	106	48	154
		85	0	255	0			102.7	106	48	154			85.3	0	255	1			102	105	48	153			85	0	255	0			102.7	106	48	154
		85	0	255	0			102.7	106	48	154			85.3	0	255	1			102	105	48	153			85	0	255	0			102.7	106	48	154
		85	0	255	0			102.7	106	48	154			85.3	0	255	1			102	105	48	153			85	0	255	0			102.7	106	48	154
		85	0	255	0			102.7	106	48	154			85.3	0	255	1			102	105	48	153			85	0	255	0			102.7	106	48	154
	Mean	85	0	255	0		Mean	102.7	106	48	154		Mean	85.3	0	255	1		Mean	102	105	48	153		Mean	85	0	255	0		Mean	102.7	106	48	154
	SD	0	0	0	0		SD	0	0	0	0		SD	0	0	0	0		SD	0	0	0	0		SD	0	0	0	0		SD	0	0	0	0
	B (RGB)						Orange						B (RGB)						Orange						B (RGB)						Orange
	ID	Mean RGB	R	G	B		ID	Mean RGB	R	G	B		ID	Mean RGB	R	G	B		ID	Mean RGB	R	G	B		ID	Mean RGB	R	G	B		ID	Mean RGB	R	G	B
	B (RGB)	85	0	0	255		Orange	127.3	255	127	0		B (RGB)	84.7	0	0	254		Orange	127.3	255	127	0		B (RGB)	85	0	0	255		Orange	127.3	255	127	0
		85	0	0	255			127.3	255	127	0			84.7	0	0	254			127.3	255	127	0			85	0	0	255			127.3	255	127	0
		85	0	0	255			127.3	255	127	0			84.7	0	0	254			127.3	255	127	0			85	0	0	255			127.3	255	127	0
		85	0	0	255			127.3	255	127	0			84.7	0	0	254			127.3	255	127	0			85	0	0	255			127.3	255	127	0
		85	0	0	255			127.3	255	127	0			84.7	0	0	254			127.3	255	127	0			85	0	0	255			127.3	255	127	0
	Mean	85	0	0	255		Mean	127.3	255	127	0		Mean	84.7	0	0	254		Mean	127.3	255	127	0		Mean	85	0	0	255		Mean	127.3	255	127	0
	SD	0	0	0	0		SD	0	0	0	0		SD	0	0	0	0		SD	0	0	0	0		SD	0	0	0	0		SD	0	0	0	0
	Black (RGB)						Green						Black (RGB)						Green						Black (RGB)						Green
	ID	Mean RGB	R	G	B		ID	Mean RGB	R	G	B		ID	Mean RGB	R	G	B		ID	Mean RGB	R	G	B		ID	Mean RGB	R	G	B		ID	Mean RGB	R	G	B
	Black (RGB)	0	0	0	0		Green	85	51	160	44		Black (RGB)	0	0	0	0		Green	84.7	51	160	43		Black (RGB)	0	0	0	0		Green	85	51	160	44
		0	0	0	0			85	51	160	44			0	0	0	0			84.7	51	160	43			0	0	0	0			85	51	160	44
		0	0	0	0			85	51	160	44			0	0	0	0			84.7	51	160	43			0	0	0	0			85	51	160	44
		0	0	0	0			85	51	160	44			0	0	0	0			84.7	51	160	43			0	0	0	0			85	51	160	44
		0	0	0	0			85	51	160	44			0	0	0	0			84.7	51	160	43			0	0	0	0			85	51	160	44
	Mean	0	0	0	0		Mean	85	51	160	44		Mean	0	0	0	0		Mean	84.7	51	160	43		Mean	0	0	0	0		Mean	85	51	160	44
	SD	0	0	0	0		SD	0	0	0	0		SD	0	0	0	0		SD	0	0	0	0		SD	0	0	0	0		SD	0	0	0	0
	TIFF 75 DPI												JPEG 75 DPI												PNG 75 DPI
	R (RGB)						Pink						R (RGB)						Pink						R (RGB)						Pink
	ID	Mean RGB	R	G	B		ID	Mean RGB	R	G	B		ID	Mean RGB	R	G	B		ID	Mean RGB	R	G	B		ID	Mean RGB	R	G	B		ID	Mean RGB	R	G	B
	R (RGB)	85	255	0	0		Pink	185	248	154	153		R (RGB)	84.7	254	0	0		Pink	185.3	248	154	154		R (RGB)	85	255	0	0		Pink	185	248	154	153
		85	255	0	0			185	248	154	153			84.7	254	0	0			185.3	248	154	154			85	255	0	0			185	248	154	153
		85	255	0	0			185	248	154	153			84.7	254	0	0			185.3	248	154	154			85	255	0	0			185	248	154	153
		85	255	0	0			185	248	154	153			84.7	254	0	0			185.3	248	154	154			85	255	0	0			185	248	154	153
		85	255	0	0			185	248	154	153			84.7	254	0	0			185.3	248	154	154			85	255	0	0			185	248	154	153
	Mean	85	255	0	0		Mean	185	248	154	153		Mean	84.7	254	0	0		Mean	185.3	248	154	154		Mean	85	255	0	0		Mean	185	248	154	153
	SD	0	0	0	0		SD	0	0	0	0		SD	0	0	0	0		SD	0	0	0	0		SD	0	0	0	0		SD	0	0	0	0
	G (RGB						Purple						G (RGB						Purple						G (RGB						Purple
	ID	Mean RGB	R	G	B		ID	Mean RGB	R	G	B		ID	Mean RGB	R	G	B		ID	Mean RGB	R	G	B		ID	Mean RGB	R	G	B		ID	Mean RGB	R	G	B
	G (RGB	85	0	255	0		Purple	102.7	106	48	154		G (RGB	85.3	0	255	1		Purple	102	105	48	153		G (RGB	85	0	255	0		Purple	102.7	106	48	154
		85	0	255	0			102.7	106	48	154			85.3	0	255	1			102	105	48	153			85	0	255	0			102.7	106	48	154
		85	0	255	0			102.7	106	48	154			85.3	0	255	1			102	105	48	153			85	0	255	0			102.7	106	48	154
		85	0	255	0			102.7	106	48	154			85.3	0	255	1			102	105	48	153			85	0	255	0			102.7	106	48	154
		85	0	255	0			102.7	106	48	154			85.3	0	255	1			102	105	48	153			85	0	255	0			102.7	106	48	154
	Mean	85	0	255	0		Mean	102.7	106	48	154		Mean	85.3	0	255	1		Mean	102	105	48	153		Mean	85	0	255	0		Mean	102.7	106	48	154
	SD	0	0	0	0		SD	0	0	0	0		SD	0	0	0	0		SD	0	0	0	0		SD	0	0	0	0		SD	0	0	0	0
	B (RGB)						Orange						B (RGB)						Orange						B (RGB)						Orange
	ID	Mean RGB	R	G	B		ID	Mean RGB	R	G	B		ID	Mean RGB	R	G	B		ID	Mean RGB	R	G	B		ID	Mean RGB	R	G	B		ID	Mean RGB	R	G	B
	B (RGB)	85	0	0	255		Orange	127.3	255	127	0		B (RGB)	84.7	0	0	254		Orange	127.3	255	127	0		B (RGB)	85	0	0	255		Orange	127.3	255	127	0
		85	0	0	255			127.3	255	127	0			84.7	0	0	254			127.3	255	127	0			85	0	0	255			127.3	255	127	0
		85	0	0	255			127.3	255	127	0			84.7	0	0	254			127.3	255	127	0			85	0	0	255			127.3	255	127	0
		85	0	0	255			127.3	255	127	0			84.7	0	0	254			127.3	255	127	0			85	0	0	255			127.3	255	127	0
		85	0	0	255			127.3	255	127	0			84.7	0	0	254			127.3	255	127	0			85	0	0	255			127.3	255	127	0
	Mean	85	0	0	255		Mean	127.3	255	127	0		Mean	84.7	0	0	254		Mean	127.3	255	127	0		Mean	85	0	0	255		Mean	127.3	255	127	0
	SD	0	0	0	0		SD	0	0	0	0		SD	0	0	0	0		SD	0	0	0	0		SD	0	0	0	0		SD	0	0	0	0
	Black (RGB)						Green						Black (RGB)						Green						Black (RGB)						Green
	ID	Mean RGB	R	G	B		ID	Mean RGB	R	G	B		ID	Mean RGB	R	G	B		ID	Mean RGB	R	G	B		ID	Mean RGB	R	G	B		ID	Mean RGB	R	G	B
	Black (RGB)	0	0	0	0		Green	85	51	160	44		Black (RGB)	0	0	0	0		Green	84.7	51	160	43		Black (RGB)	0	0	0	0		Green	85	51	160	44
		0	0	0	0			85	51	160	44			0	0	0	0			84.7	51	160	43			0	0	0	0			85	51	160	44
		0	0	0	0			85	51	160	44			0	0	0	0			84.7	51	160	43			0	0	0	0			85	51	160	44
		0	0	0	0			85	51	160	44			0	0	0	0			84.7	51	160	43			0	0	0	0			85	51	160	44
		0	0	0	0			85	51	160	44			0	0	0	0			84.7	51	160	43			0	0	0	0			85	51	160	44
	Mean	0	0	0	0		Mean	85	51	160	44		Mean	0	0	0	0		Mean	84.7	51	160	43		Mean	0	0	0	0		Mean	85	51	160	44
	SD	0	0	0	0		SD	0	0	0	0		SD	0	0	0	0		SD	0	0	0	0		SD	0	0	0	0		SD	0	0	0	0
	TIFF 36 DPI												JPEG 36 DPI												PNG 36 DPI
	R (RGB)						Pink						R (RGB)						Pink						R (RGB)						Pink
	ID	Mean RGB	R	G	B		ID	Mean RGB	R	G	B		ID	Mean RGB	R	G	B		ID	Mean RGB	R	G	B		ID	Mean RGB	R	G	B		ID	Mean RGB	R	G	B
	R (RGB)	85	255	0	0		Pink	185	248	154	153		R (RGB)	84.7	254	0	0		Pink	185.1	248	154	153		R (RGB)	85	255	0	0		Pink	185	248	154	153
		85	255	0	0			185	248	154	153			84.7	254	0	0			185.1	248	154	153			85	255	0	0			185	248	154	153
		85	255	0	0			185	248	154	153			84.7	254	0	0			185.2	248	154	154			85	255	0	0			185	248	154	153
		85	255	0	0			185	248	154	153			84.7	254	0	0			185.3	248	154	154			85	255	0	0			185	248	154	153
		85	255	0	0			185	248	154	153			84.7	254	0	0			185.3	248	154	154			85	255	0	0			185	248	154	153
	Mean	85	255	0	0		Mean	185	248	154	153		Mean	84.7	254	0	0		Mean	185.2	248	154	153.6		Mean	85	255	0	0		Mean	185	248	154	153
	SD	0	0	0	0		SD	0	0	0	0		SD	0	0	0	0		SD	0.1	0	0	0.547723		SD	0	0	0	0		SD	0	0	0	0
	G (RGB						Purple						G (RGB						Purple						G (RGB						Purple
	ID	Mean RGB	R	G	B		ID	Mean RGB	R	G	B		ID	Mean RGB	R	G	B		ID	Mean RGB	R	G	B		ID	Mean RGB	R	G	B		ID	Mean RGB	R	G	B
	G (RGB	85	0	255	0		Purple	102.7	106	48	154		G (RGB	85.3	0	255	1		Purple	102.2	105	48	153		G (RGB	85	0	255	0		Purple	102.7	106	48	154
		85	0	255	0			102.7	106	48	154			85.3	0	255	1			102.2	105	48	153			85	0	255	0			102.7	106	48	154
		85	0	255	0			102.7	106	48	154			85.3	0	255	1			102.3	106	48	153			85	0	255	0			102.7	106	48	154
		85	0	255	0			102.7	106	48	154			85.3	0	255	1			102	105	48	153			85	0	255	0			102.7	106	48	154
		85	0	255	0			102.7	106	48	154			85.3	0	255	1			102	105	48	153			85	0	255	0			102.7	106	48	154
	Mean	85	0	255	0		Mean	102.7	106	48	154		Mean	85.3	0	255	1		Mean	102.14	105.2	48	153		Mean	85	0	255	0		Mean	102.7	106	48	154
	SD	0	0	0	0		SD	0	0	0	0		SD	0	0	0	0		SD	0.134164	0.447214	0	0		SD	0	0	0	0		SD	0	0	0	0
	B (RGB)						Orange						B (RGB)						Orange						B (RGB)						Orange
	ID	Mean RGB	R	G	B		ID	Mean RGB	R	G	B		ID	Mean RGB	R	G	B		ID	Mean RGB	R	G	B		ID	Mean RGB	R	G	B		ID	Mean RGB	R	G	B
	B (RGB)	85	0	0	255		Orange	127.3	255	127	0		B (RGB)	84.8	1	0	254		Orange	127.3	255	127	0		B (RGB)	85	0	0	255		Orange	127.3	255	127	0
		85	0	0	255			127.3	255	127	0			84.7	0	0	254			127.4	255	127	0			85	0	0	255			127.3	255	127	0
		85	0	0	255			127.3	255	127	0			84.8	0	0	254			127.3	255	127	0			85	0	0	255			127.3	255	127	0
		85	0	0	255			127.3	255	127	0			84.7	0	0	254			127.3	255	127	0			85	0	0	255			127.3	255	127	0
		85	0	0	255			127.3	255	127	0			84.7	0	0	254			127.3	255	127	0			85	0	0	255			127.3	255	127	0
	Mean	85	0	0	255		Mean	127.3	255	127	0		Mean	84.74	0.2	0	254		Mean	127.32	255	127	0		Mean	85	0	0	255		Mean	127.3	255	127	0
	SD	0	0	0	0		SD	0	0	0	0		SD	0.0547723	0.447214	0	0		SD	0.0447214	0	0	0		SD	0	0	0	0		SD	0	0	0	0
	Black (RGB)						Green						Black (RGB)						Green						Black (RGB)						Green
	ID	Mean RGB	R	G	B		ID	Mean RGB	R	G	B		ID	Mean RGB	R	G	B		ID	Mean RGB	R	G	B		ID	Mean RGB	R	G	B		ID	Mean RGB	R	G	B
	Black (RGB)	0	0	0	0		Green	85	51	160	44		Black (RGB)	0	0	0	0		Green	85.2	51	160	44		Black (RGB)	0	0	0	0		Green	85	51	160	44
		0	0	0	0			85	51	160	44			0	0	0	0			84.8	51	160	43			0	0	0	0			85	51	160	44
		0	0	0	0			85	51	160	44			0	0	0	0			84.8	51	160	43			0	0	0	0			85	51	160	44
		0	0	0	0			85	51	160	44			0	0	0	0			84.8	51	160	44			0	0	0	0			85	51	160	44
		0	0	0	0			85	51	160	44			0	0	0	0			84.7	51	160	43			0	0	0	0			85	51	160	44
	Mean	0	0	0	0		Mean	85	51	160	44		Mean	0	0	0	0		Mean	84.86	51	160	43.4		Mean	0	0	0	0		Mean	85	51	160	44
	SD	0	0	0	0		SD	0	0	0	0		SD	0	0	0	0		SD	0.194936	0	0	0.547723		SD	0	0	0	0		SD	0	0	0	0

## Sheet: S2 Diff browser
	Benchmarking RGB			R	G	B		Hex				R	G	B		Hex
	Reference colors		R (RGB)	255	0	0		#ff0000			Pink	248	154	153		#F89A99
			G (RGB	0	255	0		#00ff00			Purple	106	48	154		#6a309a
			B (RGB)	0	0	255		#0000ff			Orange	255	127	0		#ff7f00
			Black (RGB)	0	0	0		#000000			Green	51	160	44		#33a02c
	JPEG 300 DPI in Edge													JPEG 300 DPI in Chrome
	R (RGB)						Pink							R (RGB)						Pink
	ID	Mean RGB	R	G	B	Sw	ID	Mean RGB	R	G	B			ID	Mean RGB	R	G	B	Sw	ID	Mean RGB	R	G	B
	R (RGB)	84.7	254	0	0		Pink	185.3	248	154	154			1	84.7	254	0	0		22	185.3	248	154	154
		84.7	254	0	0			185.3	248	154	154			3	84.7	254	0	0		23	185.3	248	154	154
		84.7	254	0	0			185.3	248	154	154			4	84.7	254	0	0		24	185.3	248	154	154
		84.7	254	0	0			185.3	248	154	154			5	84.7	254	0	0		25	185.3	248	154	154
		84.7	254	0	0			185.3	248	154	154			6	84.7	254	0	0		26	185.3	248	154	154
	Mean	84.7	254	0	0		Mean	185.3	248	154	154			Mean	84.7	254	0	0		Mean	185.3	248	154	154
	SD	0	0	0	0		SD	0	0	0	0			SD	0	0	0	0		SD	0	0	0	0
	G (RGB						Purple							G (RGB						Purple
	ID	Mean RGB	R	G	B	Sw	ID	Mean RGB	R	G	B			ID	Mean RGB	R	G	B	Sw	ID	Mean RGB	R	G	B
	G (RGB	85.3	0	255	1		Purple	102	105	48	153			7	85.3	0	255	1		27	102	105	48	153
		85.3	0	255	1			102	105	48	153			8	85.3	0	255	1		28	102	105	48	153
		85.3	0	255	1			102	105	48	153			9	85.3	0	255	1		29	102	105	48	153
		85.3	0	255	1			102	105	48	153			10	85.3	0	255	1		30	102	105	48	153
		85.3	0	255	1			102	105	48	153			11	85.3	0	255	1		31	102	105	48	153
	Mean	85.3	0	255	1		Mean	102	105	48	153			Mean	85.3	0	255	1		Mean	102	105	48	153
	SD	0	0	0	0		SD	0	0	0	0			SD	0	0	0	0		SD	0	0	0	0
	B (RGB)						Orange							B (RGB)						Orange
	ID	Mean RGB	R	G	B	Sw	ID	Mean RGB	R	G	B			ID	Mean RGB	R	G	B	Sw	ID	Mean RGB	R	G	B
	B (RGB)	84.7	0	0	254		Orange	127.3	255	127	0			12	84.7	0	0	254		32	127.3	255	127	0
		84.7	0	0	254			127.3	255	127	0			13	84.7	0	0	254		33	127.3	255	127	0
		84.7	0	0	254			127.3	255	127	0			14	84.7	0	0	254		34	127.3	255	127	0
		84.7	0	0	254			127.3	255	127	0			15	84.7	0	0	254		35	127.3	255	127	0
		84.7	0	0	254			127.3	255	127	0			16	84.7	0	0	254		36	127.3	255	127	0
	Mean	84.7	0	0	254		Mean	127.3	255	127	0			Mean	84.7	0	0	254		Mean	127.3	255	127	0
	SD	0	0	0	0		SD	0	0	0	0			SD	0	0	0	0		SD	0	0	0	0
	Black (RGB)						Green							Black (RGB)						Green
	ID	Mean RGB	R	G	B	Sw	ID	Mean RGB	R	G	B			ID	Mean RGB	R	G	B	Sw	ID	Mean RGB	R	G	B
	Black (RGB)	0	0	0	0		Green	84.7	51	160	43			17	0	0	0	0		37	84.7	51	160	43
		0	0	0	0			84.7	51	160	43			18	0	0	0	0		38	84.7	51	160	43
		0	0	0	0			84.7	51	160	43			19	0	0	0	0		39	84.7	51	160	43
		0	0	0	0			84.7	51	160	43			20	0	0	0	0		40	84.7	51	160	43
		0	0	0	0			84.7	51	160	43			21	0	0	0	0		41	84.7	51	160	43
	Mean	0	0	0	0		Mean	84.7	51	160	43			Mean	0	0	0	0		Mean	84.7	51	160	43
	SD	0	0	0	0		SD	0	0	0	0			SD	0	0	0	0		SD	0	0	0	0
